# Supplementary material for: Potential of Tetracycline Resistance Proteins To Evolve Tigecycline Resistance
Source: PubMed Central journal article supplement (PMC4750697; doi:10.1128/aac.02465-15), 2016-01-29
Supplement: AAC.02465-15_zac002164794so1.pdf [file AAC.02465-15_zac002164794so1.pdf]

## 1 Supplementary material

## 2 Tables

TABLE S1 Primer sequences

| Primer          | Sequence (5'→3')                                               | Purpose    |
|-----------------|----------------------------------------------------------------|------------|
| pBAD30_scr_F    | ATAATCACGGCAGAAAAGTCCACA                                       | Screening  |
| pBAD30_scr_R    | GGAGACCCACACTACCATC                                            | Screening  |
| pBAD30-F        | TTAGCGGATCCTACCTGACG                                           | Sequencing |
| pBAD30-R        | ACGGCGTTTCACTTCTGAGT                                           | Sequencing |
| tetM_seq        | AAACCAATGGAAGCCCAGAAA                                          | Sequencing |
| tetX_seq        | CTGCTGTTTCACTCGGTTTATT                                         | Sequencing |
| tetA_pUUH_new_F | CAGCAGAATTCGTAACAGAGAAAGAGGAGAGCAGACGTGAAACCCAACAGA            | Cloning    |
| tetA_pUUH_R     | GTATCTAGAAGGTTGATCAGCGATCGGCTCGTT                              | Cloning    |
| tetK_clon_F     | GATGAATTCCGACTAGAGAAAGAGGAGATAAAAATTGTTTAGTTTATATAAAAAATTTAAAG | Cloning    |
| tetK_clon_R     | ATATCTAGAAGGTTAACTATTCAAAGTCTTTTCAGAAC                         | Cloning    |
| tetM_clon_F     | GATGAATTCCGACTAGAGAAAGAGGAGATACCACATGAAAATTATTAATATTGGAG       | Cloning    |

|                 |                                                 |                |
|-----------------|-------------------------------------------------|----------------|
| tetM_clon_R     | ATATCTAGAACGTTACTAAGTTATTTTATTGAACATATATCTTACTT | Cloning        |
| tetX_clon_F     | AGCGAATTCAGAGAAAGAGGAGAAATACTAGATGACAATGCGAATAG | Cloning        |
| tetX_clon_R     | CAGGTCGACTCTAGATTATTATACATTTAACAATT             | Cloning        |
| tetM_S310P_F    | CCTGGAGAAATTGTTATTTTGCA                         | Reconstruction |
| tetM_S310P_R    | ATAAGCTCTATCAATCTTACATAATTCACC                  | Reconstruction |
| tetM_L505_F3    | ACTATAGCCCTGTTAGTACTC                           | Reconstruction |
| tetM_L505_R3    | AACCGTACTTAAAACAGATT                            | Reconstruction |
| tetM_S508G-R_F3 | GCCCTGTTAGTACTCCAGC                             | Reconstruction |
| tetM_S508G_R3   | CATAGTATAAACCGTACTTAAAACAGAT                    | Reconstruction |
| tetM_S508R_R3   | <b>G</b> ATAGTATAAACCGTACTTAAAACAGAT            | Reconstruction |
| tetM_Q620R_F    | <b>GG</b> ACCCGTCGTCTAAATAGTCG                  | Reconstruction |
| tetM_Q620R_R    | GGCAAACAGGTTCGCCA                               | Reconstruction |
| tetX_N221K_F    | ATTATTATTTGCTAACCCCAATAATAATG                   | Reconstruction |
| tetX_N221K_R    | TTACCTTGGTGAGATGCCATTAG                         | Reconstruction |
| tetX_T280A_F    | <b>GCG</b> ACGTTGTCATTTGTAGGA                   | Reconstruction |
| tetX_T280A_R    | ATGAATCAATTCTTTGTAGCGTTC                        | Reconstruction |
| tetX_N371I_F    | TCGAAATTGAAATGTTTAAACCC                         | Reconstruction |
| tetX_N371T_F    | CCGAAATTGAAATGTTTAAACCC                         | Reconstruction |

---

Nucleotides introducing mutation in a *tet* gene marked in bold.

3

TABLE S2 Characteristics of mutagenized sequence libraries

| Library | <i>tet</i>     | Insert    | Selection | Mutagenesis    | Transformants (x10 <sup>6</sup> CFU) |                  | Mutants |                 |
|---------|----------------|-----------|-----------|----------------|--------------------------------------|------------------|---------|-----------------|
|         | insert         | size (bp) | step      | level (SNP/kb) | Total                                | Tet <sup>r</sup> | Total   | Unique          |
| TETA4L2 | <i>tet</i> (A) | 1200      | 1         | 0.6            | 7.6                                  | 5.4              | 16      | 10 <sup>a</sup> |
| TETA6L1 | <i>tet</i> (A) | 1200      | 1         | 1.2            | 8.2                                  | 5.8              | 37      | 25 <sup>a</sup> |
| TETK4L2 | <i>tet</i> (K) | 1380      | 1         | 2.5            | 1.1                                  | 0.26             | 3       | 3               |
| TETK6L2 | <i>tet</i> (K) | 1380      | 1         | 3.3            | 1.6                                  | 0.28             | 0       | 0               |
| TETM4L2 | <i>tet</i> (M) | 1920      | 1         | 1.6            | 10                                   | 1.2              | 6       | 5               |
| TETM6L2 | <i>tet</i> (M) | 1920      | 1         | 2.7            | 10                                   | 1                | 9       | 8               |
| TETX4L1 | <i>tet</i> (X) | 1167      | 1         | 2.0            | 12                                   | 5.7              | 9       | 9               |
| TETX6L1 | <i>tet</i> (X) | 1167      | 1         | 2.6            | 9.5                                  | 4.2              | 7       | 6               |

---

Tet<sup>r</sup>, tetracycline resistant.

<sup>a</sup>The same mutants found from several different libraries.

4

TABLE S3 Characteristics of Tet mutants

| Strain number | Tet determinant | Vector | Library | Nucleotide change | Amino acid change        | Location <sup>a</sup> | TGC MIC (mg/L) <sup>b</sup> |
|---------------|-----------------|--------|---------|-------------------|--------------------------|-----------------------|-----------------------------|
| DA44405       | Tet(A)          | pBAD30 | TETA4L2 | T344C             | V115A                    | TM4                   | 1.5                         |
| DA44406       | Tet(A)          | pBAD30 | TETA4L2 | G899A             | <b>G300E<sup>c</sup></b> | P5                    | 1                           |
| DA44407       | Tet(A)          | pBAD30 | TETA4L2 | A703T             | <b>I235F<sup>c</sup></b> | TM7                   | 1.5                         |
| DA44408       | Tet(A)          | pBAD30 | TETA4L2 | A742C             | <b>I248L</b>             | TM8                   | 1                           |
| DA44409       | Tet(A)          | pBAD30 | TETA4L2 | A460G             | <b>M154V</b>             | TM5                   | 1                           |
|               |                 |        |         | T717C             | -                        | -                     |                             |
| DA44410       | Tet(A)          | pBAD30 | TETA4L2 | C804T             | -                        | -                     | 1                           |
|               |                 |        |         | G899A             | <b>G300E</b>             | P5                    |                             |
| DA44411       | Tet(A)          | pBAD30 | TETA4L2 | G899A             | <b>G300E</b>             | P5                    | 1                           |
|               |                 |        |         | A1030G            | T344A                    | TM11                  |                             |
| DA44412       | Tet(A)          | pBAD30 | TETA4L2 | T183C             | -                        | -                     | 1.5                         |
|               |                 |        |         | G899A             | <b>G300E</b>             | P5                    |                             |
| DA44413       | Tet(A)          | pBAD30 | TETA4L2 | A460G             | <b>M154V</b>             | TM5                   | 1                           |
|               |                 |        |         | G691A             | A231T                    | TM7                   |                             |
|               |                 |        |         | G709A             | G237S                    | TM7                   |                             |

|         |        |        |         |        |                          |     |     |
|---------|--------|--------|---------|--------|--------------------------|-----|-----|
| DA44414 | Tet(A) | pBAD30 | TETA4L2 | G606A  | -                        | -   | 1.5 |
|         |        |        |         | A736T  | T246S                    | TM8 |     |
|         |        |        |         | G899A  | <b>G300E</b>             | P5  |     |
| DA44415 | Tet(A) | pBAD30 | TETA6L1 | T751G  | <b>S251A<sup>c</sup></b> | TM8 | 1.5 |
| DA44416 | Tet(A) | pBAD30 | TETA6L1 | G899A  | <b>G300E<sup>c</sup></b> | P5  | 1   |
| DA44417 | Tet(A) | pBAD30 | TETA6L1 | A460G  | <b>M154V</b>             | TM5 | 1   |
| DA44418 | Tet(A) | pBAD30 | TETA6L1 | G455C  | G152A                    | TM5 | 1   |
| DA44419 | Tet(A) | pBAD30 | TETA6L1 | A703T  | <b>I235F<sup>c</sup></b> | TM7 | 1   |
| DA44420 | Tet(A) | pBAD30 | TETA6L1 | T704C  | I235T                    | TM7 | 1.5 |
| DA44421 | Tet(A) | pBAD30 | TETA6L1 | T336G  | -                        | -   | 1   |
|         |        |        |         | T751G  | <b>S251A</b>             | TM8 |     |
| DA44422 | Tet(A) | pBAD30 | TETA6L1 | T164C  | M55T                     | TM2 | 1   |
|         |        |        |         | G899A  | <b>G300E</b>             | P5  |     |
| DA44423 | Tet(A) | pBAD30 | TETA6L1 | C754A  | L252I                    | TM8 | 1.5 |
|         |        |        |         | G899A  | <b>G300E</b>             | P5  |     |
| DA44424 | Tet(A) | pBAD30 | TETA6L1 | T750G  | <b>S251A</b>             | TM8 | 1   |
|         |        |        |         | G1008T | -                        | -   |     |

|         |        |        |         |        |              |      |     |
|---------|--------|--------|---------|--------|--------------|------|-----|
| DA44425 | Tet(A) | pBAD30 | TETA6L1 | G606A  | -            | -    | 1   |
|         |        |        |         | T920C  | <b>M307T</b> | TM10 |     |
| DA44426 | Tet(A) | pBAD30 | TETA6L1 | A769G  | I257V        | TM8  | 1   |
|         |        |        |         | G899A  | <b>G300E</b> | P5   |     |
| DA44427 | Tet(A) | pBAD30 | TETA6L1 | C650G  | A217G        | TM7  | 1.5 |
|         |        |        |         | G899A  | <b>G300E</b> | P5   |     |
| DA44428 | Tet(A) | pBAD30 | TETA6L1 | A703T  | <b>I235F</b> | TM7  | 1.5 |
|         |        |        |         | A1017T | -            | -    |     |
| DA44429 | Tet(A) | pBAD30 | TETA6L1 | C870T  | -            | -    | 1.5 |
|         |        |        |         | G899A  | <b>G300E</b> | P5   |     |
| DA44430 | Tet(A) | pBAD30 | TETA6L1 | G899A  | <b>G300E</b> | P5   | 1.5 |
|         |        |        |         | T970C  | -            | -    |     |
| DA44431 | Tet(A) | pBAD30 | TETA6L1 | A788T  | Q263L        | TM8  | 1   |
|         |        |        |         | A1030T | T344S        | TM11 |     |
| DA44432 | Tet(A) | pBAD30 | TETA6L1 | C231T  | -            | -    | 1.5 |
|         |        |        |         | T282C  | -            | -    |     |
|         |        |        |         | G899A  | <b>G300E</b> | P5   |     |

|         |        |        |         |        |              |      |     |
|---------|--------|--------|---------|--------|--------------|------|-----|
| DA44433 | Tet(A) | pBAD30 | TETA6L1 | C561T  | -            | -    | 1   |
|         |        |        |         | T751G  | <b>S251A</b> | TM8  |     |
|         |        |        |         | G896A  | R299Q        | P5   |     |
| DA44434 | Tet(A) | pBAD30 | TETA6L1 | C577T  | R193C        | C3   | 1   |
|         |        |        |         | G899A  | <b>G300E</b> | P5   |     |
|         |        |        |         | C1140T | -            | -    |     |
| DA44435 | Tet(A) | pBAD30 | TETA6L1 | G382A  | E128K        | C2   | 1.5 |
|         |        |        |         | A441G  | -            | -    |     |
|         |        |        |         | G899A  | <b>G300E</b> | P5   |     |
| DA44436 | Tet(A) | pBAD30 | TETA6L1 | C885T  | -            | -    | 1   |
|         |        |        |         | G899A  | <b>G300E</b> | P5   |     |
|         |        |        |         | T920C  | <b>M307T</b> | TM10 |     |
| DA44437 | Tet(A) | pBAD30 | TETA6L1 | T749C  | I250T        | TM8  | 1.5 |
|         |        |        |         | C791T  | A264V        | TM8  |     |
|         |        |        |         | C1070A | A357E        | TM11 |     |
| DA44438 | Tet(A) | pBAD30 | TETA6L1 | G745A  | G249S        | TM8  | 1.5 |
|         |        |        |         | G753A  | -            | -    |     |

|         |        |        |         |        |              |        |       |
|---------|--------|--------|---------|--------|--------------|--------|-------|
|         |        |        |         | C1025T | A342V        | TM11   |       |
| DA44439 | Tet(A) | pBAD30 | TETA6L1 | C735A  | -            | -      | 1     |
|         |        |        |         | G899A  | <b>G300E</b> | P5     |       |
|         |        |        |         | A1045G | I349V        | TM11   |       |
|         |        |        |         | A1087G | I363V        | P6     |       |
|         |        |        |         | T1125C | -            | -      |       |
| DA44443 | Tet(K) | pBAD30 | TETK4L2 | T172C  | <b>Y58H</b>  | TM2    | 0.19  |
|         |        |        |         | G177A  | M59I         | TM2    |       |
| DA44444 | Tet(K) | pBAD30 | TETK4L2 | T172C  | <b>Y58H</b>  | TM2    | 0.19  |
|         |        |        |         | C218T  | S73F         | C1     |       |
|         |        |        |         | T602C  | I201T        | TM7    |       |
|         |        |        |         | T795A  | -            | -      |       |
|         |        |        |         | T1134A | -            | -      |       |
| DA44445 | Tet(K) | pBAD30 | TETK4L2 | T67A   | S23T         | TM1    | 0.19  |
|         |        |        |         | T377C  | V126A        | TM4 C2 |       |
|         |        |        |         | T1038C | -            | -      |       |
| DA44446 | Tet(M) | pUCBAD | TETM4L2 | A1255G | I419V        | IV     | 0.094 |



|         |        |        |         |                 |                |       |       |
|---------|--------|--------|---------|-----------------|----------------|-------|-------|
|         |        |        |         | A1494G          | -              | -     |       |
|         |        |        |         | C1524A          | <b>S508R</b>   | IV L3 |       |
| DA44447 | Tet(M) | pUCBAD | TETM4L2 | T405A           | -              | -     | 0.094 |
|         |        |        |         | T928C           | <b>S310P</b>   | II    |       |
|         |        |        |         | T1262A          | M421K          | IV    |       |
|         |        |        |         | A1412G          | Q471R          | IV    |       |
|         |        |        |         | A1522G          | <b>S508G</b>   | IV L3 |       |
| DA44448 | Tet(M) | pUCBAD | TETM4L2 | A783G           | -              | -     | 0.38  |
|         |        |        |         | T1470C          | -              | -     |       |
|         |        |        |         | TAT1514_1516del | <b>L505del</b> | IV L3 |       |
|         |        |        |         | A1837T          | T613S          | CTE   |       |
| DA44449 | Tet(M) | pUCBAD | TETM4L2 | G806A           | R269H          | II    | 0.125 |
|         |        |        |         | A1076G          | E359G          | III   |       |
|         |        |        |         | A1522C          | <b>S508R</b>   | IV L3 |       |
| DA44450 | Tet(M) | pUCBAD | TETM4L2 | A778G           | K260E          | II    | 0.125 |
|         |        |        |         | A1522G          | <b>S508G</b>   | IV L3 |       |
| DA44451 | Tet(M) | pUCBAD | TETM6L2 | T493A           | C165S          | I     | 0.25  |

|         |        |        |         |                 |                |       |       |
|---------|--------|--------|---------|-----------------|----------------|-------|-------|
|         |        |        |         | A1004G          | Q335R          | II    |       |
|         |        |        |         | TAT1514_1516del | <b>L505del</b> | IV L3 |       |
| DA44452 | Tet(M) | pUCBAD | TETM6L2 | A862G           | K288E          | II    | 0.125 |
|         |        |        |         | C1030A          | P344T          | III   |       |
|         |        |        |         | C1524G          | <b>S508R</b>   | IV L3 |       |
|         |        |        |         | A1539G          | -              | -     |       |
| DA44453 | Tet(M) | pUCBAD | TETM6L2 | T236A           | M79K           | I     | 0.125 |
|         |        |        |         | T412C           | S138P          | I     |       |
|         |        |        |         | G589A           | A197T          | I     |       |
|         |        |        |         | A1052T          | E351V          | III   |       |
|         |        |        |         | C1064T          | P355L          | III   |       |
|         |        |        |         | T1167G          | -              | -     |       |
|         |        |        |         | T1500C          | -              | -     |       |
|         |        |        |         | A1522C          | <b>S508R</b>   | IV L3 |       |
|         |        |        |         | A1589G          | K530R          | IV    |       |
| DA44454 | Tet(M) | pUCBAD | TETM6L2 | A217T           | I73L           | I     | 0.125 |
|         |        |        |         | T330C           | -              | -     |       |

|         |        |        |         |        |              |       |       |
|---------|--------|--------|---------|--------|--------------|-------|-------|
|         |        |        |         | T409C  | -            | -     |       |
|         |        |        |         | A1028T | H343L        | III   |       |
|         |        |        |         | A1443G | I481M        | IV    |       |
|         |        |        |         | C1524A | <b>S508R</b> | IV L3 |       |
| DA44455 | Tet(M) | pUCBAD | TETM6L2 | A414G  | -            | -     | 0.19  |
|         |        |        |         | A1522C | <b>S508R</b> | IV L3 |       |
|         |        |        |         | T1784C | F595S        | V     |       |
| DA44456 | Tet(M) | pUCBAD | TETM6L2 | A58T   | T20S         | I     | 0.125 |
|         |        |        |         | T928C  | <b>S310P</b> | II    |       |
|         |        |        |         | C1524A | <b>S508R</b> | IV L3 |       |
| DA44457 | Tet(M) | pUCBAD | TETM6L2 | C1524A | <b>S508R</b> | IV L3 | 0.19  |
|         |        |        |         | A1698G | -            | -     |       |
|         |        |        |         | A1859G | <b>Q620R</b> | CTE   |       |
| DA44458 | Tet(M) | pUCBAD | TETM6L2 | A156G  | -            | -     | 0.19  |
|         |        |        |         | T975C  | -            | -     |       |
|         |        |        |         | A1522C | <b>S508R</b> | IV L3 |       |
|         |        |        |         | A1656G | -            | -     |       |

|                      |        |        |         |                 |                |               |       |
|----------------------|--------|--------|---------|-----------------|----------------|---------------|-------|
|                      |        |        |         | A1752G          | -              | -             |       |
|                      |        |        |         | A1859G          | <b>Q620R</b>   | CTE           |       |
| DA38587 <sup>d</sup> | Tet(M) | pUCBAD | -       | TAT1514_1516del | <b>L505del</b> | IV L3         | 0.38  |
| DA38583 <sup>d</sup> | Tet(M) | pUCBAD | -       | A1522G          | <b>S508G</b>   | IV L3         | 0.125 |
| DA38586 <sup>d</sup> | Tet(M) | pUCBAD | -       | A1522C          | <b>S508R</b>   | IV L3         | 0.125 |
| DA40424 <sup>d</sup> | Tet(M) | pUCBAD | -       | T928C           | <b>S310P</b>   | II            | 0.064 |
| DA40425 <sup>d</sup> | Tet(M) | pUCBAD | -       | A1859G          | <b>Q620R</b>   | CTE           | 0.094 |
| DA40426 <sup>d</sup> | Tet(M) | pUCBAD | -       | T928C           | <b>S310P</b>   | II            | 0.094 |
|                      |        |        |         | A1522G          | <b>S508G</b>   | IV L3         |       |
| DA40427 <sup>d</sup> | Tet(M) | pUCBAD | -       | T928C           | <b>S310P</b>   | II            | 0.19  |
|                      |        |        |         | A1522C          | <b>S508R</b>   | IV L3         |       |
| DA40428 <sup>d</sup> | Tet(M) | pUCBAD | -       | A1522C          | <b>S508R</b>   | IV L3         | 0.25  |
|                      |        |        |         | A1859G          | <b>Q620R</b>   | CTE           |       |
| DA44459              | Tet(X) | pBAD30 | TETX4L1 | A838G           | <b>T280A</b>   | D2 $\alpha$ 9 | 0.75  |
|                      |        |        |         | T854A           | V285E          | D2 $\beta$ 16 |       |
| DA44460              | Tet(X) | pBAD30 | TETX4L1 | T171C           | -              | -             | 0.5   |
|                      |        |        |         | A838G           | <b>T280A</b>   | D2 $\alpha$ 9 |       |

|         |        |        |         |        |              |                |      |
|---------|--------|--------|---------|--------|--------------|----------------|------|
|         |        |        |         | T879C  | -            | -              |      |
|         |        |        |         | T1005C | -            | -              |      |
| DA44461 | Tet(X) | pBAD30 | TETX4L1 | A838G  | <b>T280A</b> | D2 $\alpha$ 9  | 0.75 |
| DA44462 | Tet(X) | pBAD30 | TETX4L1 | G55A   | V19I         | D1 $\beta$ 1   | 0.75 |
|         |        |        |         | A162G  | -            | -              |      |
| DA44463 | Tet(X) | pBAD30 | TETX4L1 | C5T    | T2I          | D1             | 1    |
|         |        |        |         | T276C  | -            | -              |      |
|         |        |        |         | A522G  | -            | -              |      |
|         |        |        |         | T663G  | <b>N221K</b> | D2 $\beta$ 14  |      |
| DA44464 | Tet(X) | pBAD30 | TETX4L1 | T663A  | <b>N221K</b> | D2 $\beta$ 14  | 3    |
|         |        |        |         | T859G  | L287V        | D2 $\beta$ 16  |      |
|         |        |        |         | A1068G | -            | -              |      |
|         |        |        |         | A1112C | <b>N371T</b> | $\alpha$ 12    |      |
| DA44465 | Tet(X) | pBAD30 | TETX4L1 | T982A  | L328M        | D1 $\alpha$ 11 | 3    |
|         |        |        |         | A1112C | <b>N371T</b> | $\alpha$ 12    |      |
| DA44466 | Tet(X) | pBAD30 | TETX4L1 | A155T  | E52V         | D1             | 3    |
|         |        |        |         | A239G  | Y80C         | D1 $\alpha$ 3  |      |

|         |        |        |         |        |              |               |      |
|---------|--------|--------|---------|--------|--------------|---------------|------|
|         |        |        |         | A1112C | <b>N371T</b> | $\alpha$ 12   |      |
| DA44467 | Tet(X) | pBAD30 | TETX4L1 | A838G  | <b>T280A</b> | D2 $\alpha$ 9 | 3    |
|         |        |        |         | T954C  | -            | -             |      |
| DA44468 | Tet(X) | pBAD30 | TETX6L1 | T36C   | -            | -             | 0.75 |
|         |        |        |         | A838G  | <b>T280A</b> | D2 $\alpha$ 9 |      |
| DA44469 | Tet(X) | pBAD30 | TETX6L1 | A305G  | K102R        | D2            | 0.75 |
|         |        |        |         | A798G  | -            | -             |      |
|         |        |        |         | A838G  | <b>T280A</b> | D2 $\alpha$ 9 |      |
|         |        |        |         | G840A  |              |               |      |
| DA44470 | Tet(X) | pBAD30 | TETX6L1 | G462A  | -            | -             | 1    |
|         |        |        |         | T729G  | D243E        | D2            |      |
|         |        |        |         | A1051G | K351E        | $\alpha$ 12   |      |
|         |        |        |         | A1112T | <b>N371I</b> | $\alpha$ 12   |      |
| DA44471 | Tet(X) | pBAD30 | TETX6L1 | A841G  | T281A        | D2            | 1.5  |
|         |        |        |         | A1112T | <b>N371I</b> | $\alpha$ 12   |      |
| DA44472 | Tet(X) | pBAD30 | TETX6L1 | A84G   | -            | -             | 1.5  |
|         |        |        |         | A437G  | K146R        | D1            |      |

|                      |        |        |         |        |              |                |     |
|----------------------|--------|--------|---------|--------|--------------|----------------|-----|
|                      |        |        |         | A838G  | <b>T280A</b> | D2 $\alpha$ 9  |     |
|                      |        |        |         | G985A  | V329M        | D1 $\alpha$ 11 |     |
|                      |        |        |         | G1018A | D340N        | D1             |     |
| DA44473              | Tet(X) | pBAD30 | TETX6L1 | T45C   | -            | -              | 1.5 |
|                      |        |        |         | A838G  | <b>T280A</b> | D2 $\alpha$ 9  |     |
| DA40421 <sup>d</sup> | Tet(X) | pBAD30 | -       | A838G  | <b>T280A</b> | D2 $\alpha$ 9  | 0.5 |
| DA40422 <sup>d</sup> | Tet(X) | pBAD30 | -       | A1112T | <b>N371I</b> | $\alpha$ 12    | 0.5 |
| DA40423 <sup>d</sup> | Tet(X) | pBAD30 | -       | A1112C | <b>N371T</b> | $\alpha$ 12    | 0.5 |
| DA40420 <sup>d</sup> | Tet(X) | pBAD30 | -       | T663A  | <b>N221K</b> | D2 $\beta$ 14  | 0.5 |

---

TGC, tigecycline; TM, transmembrane; P, periplasmic; C, cytoplasmic; I-V, domains I-V; L, loop; CTE, C-terminal extension; D1, FAD-binding domain; D2, substrate-binding domain;  $\alpha$ ,  $\alpha$ -helix;  $\beta$ ,  $\beta$ -strand; del, deletion.

<sup>a</sup>Tet(A) pump division into periplasmic and cytoplasmic loops and transmembrane regions is only predictive.

<sup>b</sup>The following L-arabinose concentrations were used for MIC measurements during selections: 0.1% for Tet(A), Tet(K) and Tet(X); 0.2% for Tet(M).

<sup>c</sup>The same mutants found from several different libraries.

<sup>d</sup>Reconstructed mutants.

Amino acid changes that are repeatedly isolated more than once in the independent mutants are in bold.
